# Supplementary material for: Elevated Oxytocin Receptor Blood Concentrations Predict Higher Risk for, More, and Earlier 24-Month Hospital Readmissions after In-Patient Detoxification in Males with Alcohol Use Disorder
Source: MDPI journal article supplement (doi:10.3390/ijms23179940), 2022-09-01
Supplement: s1 [file s1]

# Elevated Oxytocin Receptor Blood Concentrations Predict Higher Risk for, More, and Earlier 24-Month Hospital Readmissions after In-Patient Detoxification in Males with Alcohol Use Disorder

Christiane Mühle, Massimiliano Mazza, Christian Weinland, Claudia von Zimmermann, Patrick Bach, Falk Kiefer, Valery Grinevich, Iulia Zoicas, Johannes Kornhuber, Bernd Lenz

## Supplementary Material

**Supplementary Table S1.** Risk of alcohol-related readmission during the 24-month follow-up period depending on oxytocin and oxytocin receptor serum levels using male-specific Youden cut-off points of 37.6 pg/mL for oxytocin (based on data from [52], resulting in a sensitivity of 0.42, a specificity of 0.78, area under the curve 0.611, standard error under the non-parametric assumption 0.056,  $p = 0.046$ ) and of 0.351 ng/mL for the oxytocin receptor (see text for details; the groups differed significantly in terms of readmission risk,  $\chi^2 = 12.6$ ,  $p = 0.006$ )

| Number (percentage) of male patients<br>with alcohol-related hospital re-admission | OXTR<br>< 0.351 ng/mL | OXTR<br>≥ 0.351 ng/mL |
|------------------------------------------------------------------------------------|-----------------------|-----------------------|
| OXT < 37.6 pg/mL                                                                   | 19 out of 37 (51.4%)  | 25 out of 36 (69.4%)  |
| OXT ≥ 37.6 pg/mL                                                                   | 3 out of 7 (42.9%)    | 29 out of 33 (87.9%)  |

OXT, oxytocin; OXTR oxytocin receptor.

**Supplementary Table S2.** Comparison of baseline oxytocin receptor serum levels (ng/mL) in male and female in-patients with alcohol use disorder between those with and those without prospective 24-month hospital readmission

|                             | With readmission |       |       |       | Without readmission |       |       |       | U   | <i>p</i>     |
|-----------------------------|------------------|-------|-------|-------|---------------------|-------|-------|-------|-----|--------------|
|                             | N                | M     | IQR   |       | N                   | M     | IQR   |       |     |              |
| Male in-patients with AUD   | 76               | 0.456 | 0.317 | 0.712 | 37                  | 0.319 | 0.185 | 0.500 | 939 | <b>0.004</b> |
| Female in-patients with AUD | 46               | 0.491 | 0.288 | 0.724 | 41                  | 0.452 | 0.328 | 0.749 | 913 | 0.799        |

AUD, alcohol use disorder; the table shows medians (M), interquartile ranges (IQR), and results from Mann-Whitney U tests.  $p < 0.05$  in bold.

**Supplementary Table S3.** Spearman correlations between baseline oxytocin receptor serum levels, number of alcohol-related readmissions, and latency to first alcohol-related readmission during the prospective 24-month period

|                             | Alcohol-related hospital readmission |          |              |                |              |  |
|-----------------------------|--------------------------------------|----------|--------------|----------------|--------------|--|
|                             | Number                               |          |              | Latency (days) |              |  |
|                             | N                                    | <i>ρ</i> | <i>p</i>     | <i>ρ</i>       | <i>p</i>     |  |
| Male in-patients with AUD   | 113                                  | 0.249    | <b>0.008</b> | -0.268         | <b>0.004</b> |  |
| Female in-patients with AUD | 87                                   | -0.021   | 0.848        | 0.000          | 0.997        |  |

AUD, alcohol use disorder;  $p < 0.05$  in bold.

**Supplementary Table S4.** Baseline oxytocin receptor serum levels (ng/mL) and smoking status in male and female groups of in-patients with alcohol use disorder and healthy control subjects.

|                             | Smoker |       |       |       | Non-smoker |       |       |       | U    | <i>p</i> <sup>#</sup> |
|-----------------------------|--------|-------|-------|-------|------------|-------|-------|-------|------|-----------------------|
|                             | N      | M     | IQR   |       | N          | M     | IQR   |       |      |                       |
| Male in-patients with AUD   | 81     | 0.412 | 0.246 | 0.608 | 23         | 0.442 | 0.302 | 0.903 | 745  | 0.144                 |
| Female in-patients with AUD | 60     | 0.411 | 0.252 | 0.610 | 18         | 0.668 | 0.470 | 1.301 | 267  | <b>0.001</b>          |
| Male controls               | 29     | 0.402 | 0.304 | 0.653 | 104        | 0.438 | 0.282 | 0.700 | 1380 | 0.486                 |
| Female controls             | 20     | 0.253 | 0.175 | 0.429 | 87         | 0.494 | 0.250 | 0.894 | 503  | <b>0.003</b>          |

AUD, alcohol use disorder; medians (M), interquartile ranges (IQR). <sup>#</sup>Mann-Whitney U tests. *p* < 0.05 in bold.

**Supplementary Table S5.** Spearman correlations between baseline oxytocin receptor serum levels and age in male and female groups of in-patients with alcohol use disorder and healthy control subjects.

|                             | Age |          |              |
|-----------------------------|-----|----------|--------------|
|                             | N   | <i>ρ</i> | <i>p</i>     |
| Male in-patients with AUD   | 113 | 0.026    | 0.784        |
| Female in-patients with AUD | 87  | 0.039    | 0.721        |
| Male controls               | 133 | -0.192   | <b>0.027</b> |
| Female controls             | 107 | -0.246   | <b>0.011</b> |

AUD, alcohol use disorder. *p* < 0.05 in bold.

**Supplementary Table S6.** Spearman correlations between baseline oxytocin receptor serum levels, dihydrotestosterone, testosterone, estradiol, and progesterone in male and female groups of in-patients with alcohol use disorder and healthy control subjects

|                             | N   | Dihydro-testosterone |              | Testosterone |              | Estradiol |          | Progesterone |          |
|-----------------------------|-----|----------------------|--------------|--------------|--------------|-----------|----------|--------------|----------|
|                             |     | <i>ρ</i>             | <i>p</i>     | <i>ρ</i>     | <i>p</i>     | <i>ρ</i>  | <i>p</i> | <i>ρ</i>     | <i>p</i> |
| Male in-patients with AUD   | 113 | 0.073                | 0.445        | -0.005       | 0.956        | -0.004    | 0.964    | -0.016       | 0.864    |
| Female in-patients with AUD | 87  | 0.025                | 0.819        | 0.000        | 1.000        | 0.119     | 0.272    | -0.010       | 0.926    |
| Male controls               | 133 | 0.189                | <b>0.030</b> | 0.134        | 0.124        | 0.057     | 0.516    | 0.165        | 0.057    |
| Female controls             | 107 | 0.148                | 0.129        | 0.281        | <b>0.003</b> | 0.136     | 0.163    | 0.186        | 0.055    |

AUD, alcohol use disorder. *p* < 0.05 in bold.
